# Supplementary material
Source: Springer Nature journal article supplement (https://www.springermedizin.de/resource/supplementary/12960_2012_346_MOESM1_ESM.pdf/9569892)

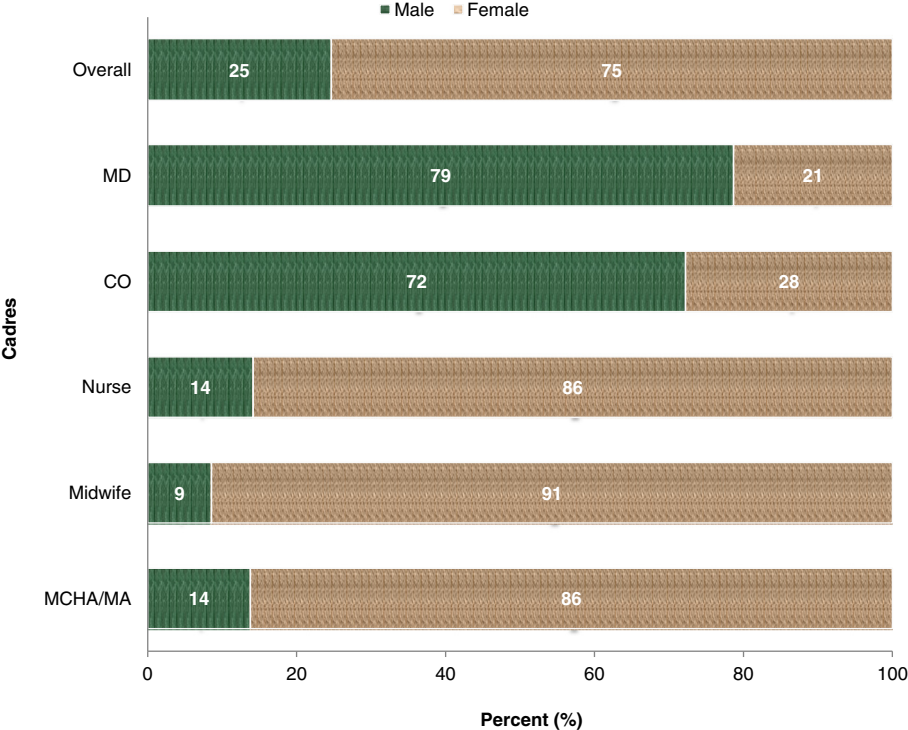

Supplement: MOESM1 [file 9569892]
